# Supplementary material
Source: PubMed Central journal article supplement (PMC3585515)
Supplement: supp_125.24.5974_JCS108886.pdf [file supp_125.24.5974_JCS108886.pdf]

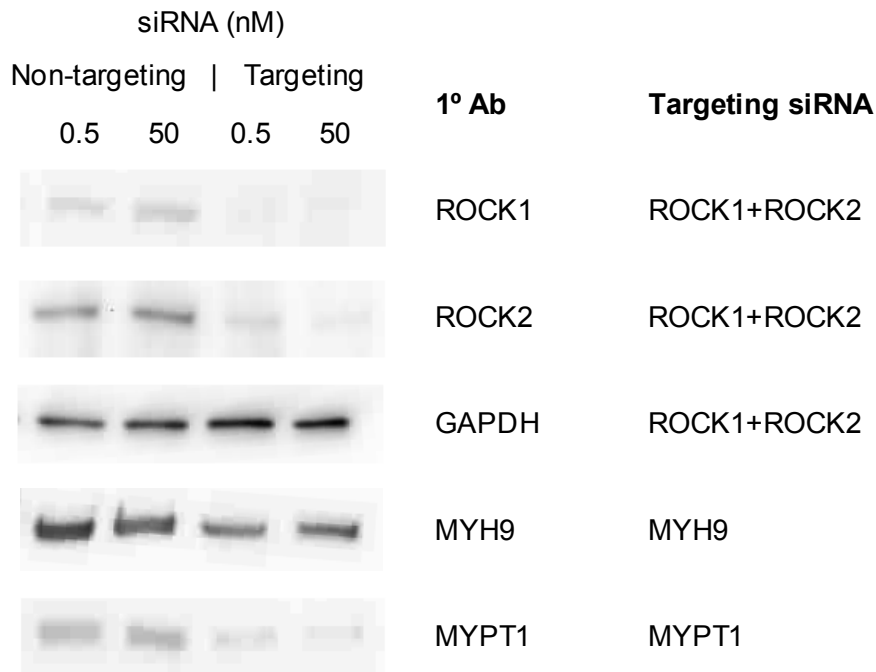

**Fig. S1. Western blotting evaluation of siRNA knockdown.** Fibroblasts grown on rigid (glass) substrates were transfected with the indicated concentrations of non-targeting or targeting siRNA. Similar siRNA knockdown efficacy is observed on soft hydrogels (data not shown). For ROCK1+ROCK2 co-transfections, 0.25 or 25 nM of each siRNA was used. Protein was isolated 72 hours after transfection. GAPDH serves as a loading control for the non-targeting and ROCK1+ROCK2 conditions.

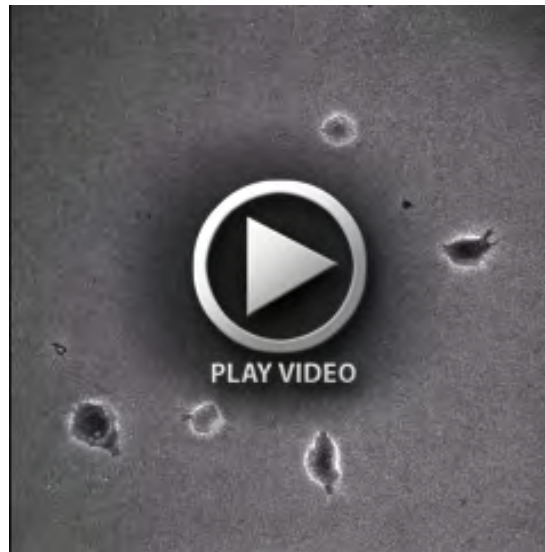

**Movie 1.** Phase contrast image sequence of IMR-90 fibroblasts on a 1 kPa substrate before and after addition of 10  $\mu\text{M}$  Y27632 (at frame 31, 2 sec).

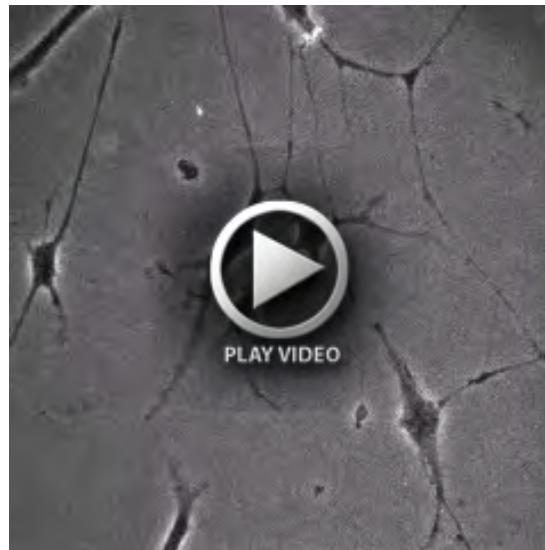

**Movie 2.** Phase contrast image sequence of IMR-90 fibroblasts following washout of Y27632. Images were acquired at 2 min intervals, 200x magnification, and compiled at 15 frames/sec.

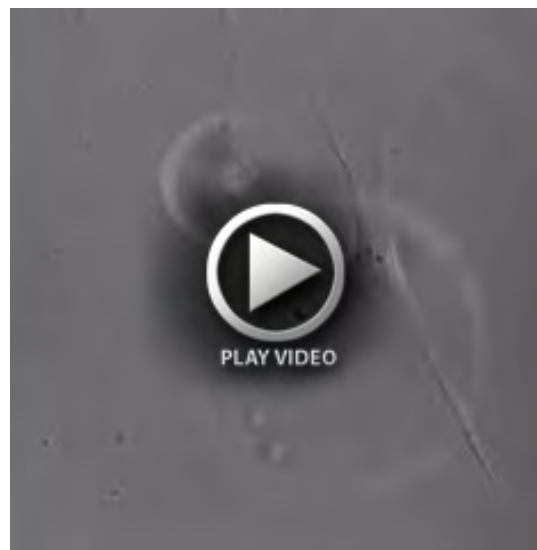

**Movie 3.** Phase contrast image sequence of IMR-90 fibroblasts on a 1 kPa substrate after addition of 0.3  $\mu\text{M}$  cantharidin. Images were acquired at 10 min intervals, 200x magnification, and compiled at 2 frames/sec.

**Table S1. Profile of cell cycle gene expression in IMR-90 fibroblasts.** For each condition, changes in transcript levels are normalized to a panel of housekeeping genes, and then expressed relative to the 1 kPa, no treatment control.

| Symbol   | Description                                                         | 1 kPa | 1 kPa + Y27632 | Rigid  | Rigid +Y27632 |
|----------|---------------------------------------------------------------------|-------|----------------|--------|---------------|
| ABL1     | C-abl oncogene 1, non-receptor tyrosine kinase                      | 1     | 0.485          | 1.0345 | 0.6522        |
| ANAPC2   | Anaphase promoting complex subunit 2                                | 1     | 0.4412         | 1.178  | 1.1432        |
| ATR      | Ataxia telangiectasia and Rad3 related                              | 1     | 0.6424         | 0.5195 | 0.5656        |
| AURKA    | Aurora kinase A                                                     | 1     | 0.5688         | 0.9732 | 0.6778        |
| AURKB    | Aurora kinase B                                                     | 1     | 0.7715         | 0.5515 | 0.7635        |
| BCCIP    | BRCA2 and CDKN1A interacting protein                                | 1     | 0.4579         | 1.4387 | 1.4579        |
| BCL2     | B-cell CLL/lymphoma 2                                               | 1     | 0.9058         | 0.8427 | 0.6226        |
| BIRC5    | Baculoviral IAP repeat containing 5                                 | 1     | 0.7923         | 1.447  | 1.3317        |
| BRCA1    | Breast cancer 1, early onset                                        | 1     | 0.8837         | 1.0382 | 0.7845        |
| BRCA2    | Breast cancer 2, early onset                                        | 1     | 0.709          | 1.2939 | 1.078         |
| CASP3    | Caspase 3, apoptosis-related cysteine peptidase                     | 1     | 0.6996         | 1.6761 | 0.8295        |
| CCNA2    | Cyclin A2                                                           | 1     | 0.9015         | 1.3686 | 0.8332        |
| CCNB1    | Cyclin B1                                                           | 1     | 1.0724         | 1.2683 | 0.8197        |
| CCNB2    | Cyclin B2                                                           | 1     | 0.9239         | 1.2286 | 0.7428        |
| CCNC     | Cyclin C                                                            | 1     | 0.6458         | 1.5687 | 1.3432        |
| CCND1    | Cyclin D1                                                           | 1     | 0.9607         | 1.8183 | 1.283         |
| CCND2    | Cyclin D2                                                           | 1     | 0.3938         | 1.3734 | 0.7584        |
| CCND3    | Cyclin D3                                                           | 1     | 0.3481         | 2.5126 | 1.8493        |
| CCNE1    | Cyclin E1                                                           | 1     | 1.0795         | 1.1718 | 0.9893        |
| CCNF     | Cyclin F                                                            | 1     | 0.8067         | 0.9553 | 0.9025        |
| CCNG1    | Cyclin G1                                                           | 1     | 0.8925         | 1.0701 | 0.7013        |
| CCNG2    | Cyclin G2                                                           | 1     | 0.505          | 1.2193 | 0.704         |
| CCNH     | Cyclin H                                                            | 1     | 0.5612         | 0.7453 | 0.5837        |
| CCNT1    | Cyclin T1                                                           | 1     | 0.9036         | 0.7322 | 0.5243        |
| CDC16    | Cell division cycle 16 homolog (S. cerevisiae)                      | 1     | 1.1951         | 1.8278 | 0.8269        |
| CDC20    | Cell division cycle 20 homolog (S. cerevisiae)                      | 1     | 0.6473         | 1.2699 | 0.8903        |
| CDC25A   | Cell division cycle 25 homolog A (S. pombe)                         | 1     | 0.3856         | 1.3874 | 1.0553        |
| CDC25C   | Cell division cycle 25 homolog C (S. pombe)                         | 1     | 0.9675         | 0.9028 | 0.6351        |
| CDC34    | Cell division cycle 34 homolog (S. cerevisiae)                      | 1     | 0.9291         | 0.9389 | 0.6426        |
| CDC6     | Cell division cycle 6 homolog (S. cerevisiae)                       | 1     | 0.3727         | 1.2094 | 0.5952        |
| CDK1     | Cyclin-dependent kinase 1                                           | 1     | 0.5083         | 1.0164 | 0.8214        |
| CDK2     | Cyclin-dependent kinase 2                                           | 1     | 0.4739         | 1.2037 | 0.6686        |
| CDK4     | Cyclin-dependent kinase 4                                           | 1     | 0.7919         | 0.9038 | 0.5471        |
| CDK5R1   | Cyclin-dependent kinase 5, regulatory subunit 1 (p35)               | 1     | 0.8243         | 0.9794 | 0.5834        |
| CDK5RAP1 | CDK5 regulatory subunit associated protein 1                        | 1     | 0.7477         | 0.8799 | 0.5438        |
| CDK6     | Cyclin-dependent kinase 6                                           | 1     | 0.6167         | 1.7037 | 1.485         |
| CDK7     | Cyclin-dependent kinase 7                                           | 1     | 1.1416         | 1.0338 | 1.0919        |
| CDK8     | Cyclin-dependent kinase 8                                           | 1     | 0.9365         | 1.0323 | 0.658         |
| CDKN1A   | Cyclin-dependent kinase inhibitor 1A (p21, Cip1)                    | 1     | 0.8961         | 1.9026 | 1.2463        |
| CDKN1B   | Cyclin-dependent kinase inhibitor 1B (p27, Kip1)                    | 1     | 0.8755         | 1.0965 | 0.7509        |
| CDKN2A   | Cyclin-dependent kinase inhibitor 2A (melanoma, p16, inhibits CDK4) | 1     | 0.7876         | 0.9557 | 0.5916        |
| CDKN2B   | Cyclin-dependent kinase inhibitor 2B (p15, inhibits CDK4)           | 1     | 1.0204         | 1.2935 | 1.0065        |
| CDKN3    | Cyclin-dependent kinase inhibitor 3                                 | 1     | 0.8378         | 1.5588 | 1.1824        |
| CHEK1    | CHK1 checkpoint homolog (S. pombe)                                  | 1     | 0.8634         | 0.8742 | 0.7349        |
| CKS1B    | CDC28 protein kinase regulatory subunit 1B                          | 1     | 0.8844         | 0.7246 | 0.6131        |
| CKS2     | CDC28 protein kinase regulatory subunit 2                           | 1     | 0.3982         | 1.1877 | 1.0142        |

|         |                                                                     |   |        |        |        |
|---------|---------------------------------------------------------------------|---|--------|--------|--------|
| CUL2    | Cullin 2                                                            | 1 | 1.0267 | 0.9997 | 0.9892 |
| E2F1    | E2F transcription factor 1                                          | 1 | 0.9856 | 1.1033 | 0.7181 |
| E2F4    | E2F transcription factor 4, p107/p130-binding                       | 1 | 0.8477 | 1.3832 | 0.9555 |
| GADD45A | Growth arrest and DNA-damage-inducible, alpha                       | 1 | 1.1697 | 1.0231 | 0.8399 |
| GTSE1   | G-2 and S-phase expressed 1                                         | 1 | 0.7593 | 1.44   | 0.9906 |
| HUS1    | HUS1 checkpoint homolog (S. pombe)                                  | 1 | 0.8684 | 0.7826 | 0.5811 |
| KNTC1   | Kinetochores associated 1                                           | 1 | 0.6607 | 0.9556 | 0.606  |
| KPNA2   | Karyopherin alpha 2 (RAG cohort 1, importin alpha 1)                | 1 | 0.8675 | 1.4081 | 1.0181 |
| MAD2L1  | MAD2 mitotic arrest deficient-like 1 (yeast)                        | 1 | 0.4383 | 1.5059 | 1.2541 |
| MAD2L2  | MAD2 mitotic arrest deficient-like 2 (yeast)                        | 1 | 0.1298 | 1.4487 | 1.3456 |
| MCM2    | Minichromosome maintenance complex component 2                      | 1 | 0.5905 | 1.0974 | 0.7266 |
| MCM3    | Minichromosome maintenance complex component 3                      | 1 | 0.5879 | 1.4588 | 0.9143 |
| MCM4    | Minichromosome maintenance complex component 4                      | 1 | 0.4273 | 1.089  | 0.8579 |
| MCM5    | Minichromosome maintenance complex component 5                      | 1 | 0.5808 | 1.6935 | 0.8643 |
| MDM2    | Mdm2 p53 binding protein homolog (mouse)                            | 1 | 0.8872 | 1.0891 | 0.5905 |
| MKI67   | Antigen identified by monoclonal antibody Ki-67                     | 1 | 0.5137 | 1.4869 | 1.497  |
| MNAT1   | Menage a trois homolog 1, cyclin H assembly factor (Xenopus laevis) | 1 | 0.7794 | 1.0918 | 0.7652 |
| MRE11A  | MRE11 meiotic recombination 11 homolog A (S. cerevisiae)            | 1 | 1.6962 | 2.4657 | 1.5792 |
| NBN     | Nibrin                                                              | 1 | 0.9891 | 0.7195 | 0.5762 |
| RAD1    | RAD1 homolog (S. pombe)                                             | 1 | 0.9127 | 0.757  | 0.6637 |
| RAD17   | RAD17 homolog (S. pombe)                                            | 1 | 0.974  | 0.9555 | 0.8911 |
| RAD51   | RAD51 homolog (S. cerevisiae)                                       | 1 | 0.4441 | 0.7951 | 0.7601 |
| RAD9A   | RAD9 homolog A (S. pombe)                                           | 1 | 0.9363 | 1.6467 | 0.9611 |
| RB1     | Retinoblastoma 1                                                    | 1 | 1.1108 | 1.2121 | 0.706  |
| RBBP8   | Retinoblastoma binding protein 8                                    | 1 | 0.6596 | 1.2618 | 0.9633 |
| RBL1    | Retinoblastoma-like 1 (p107)                                        | 1 | 0.9453 | 0.8861 | 1.0161 |
| RBL2    | Retinoblastoma-like 2 (p130)                                        | 1 | 0.8969 | 1.1147 | 0.8919 |
| SERTAD1 | SERTA domain containing 1                                           | 1 | 0.4999 | 0.8991 | 0.6486 |
| SKP2    | S-phase kinase-associated protein 2 (p45)                           | 1 | 0.7572 | 1.2387 | 0.7905 |
| STMN1   | Stathmin 1                                                          | 1 | 0.9171 | 0.9505 | 0.7916 |
| TFDP1   | Transcription factor Dp-1                                           | 1 | 0.4876 | 1.5845 | 1.3417 |
| TFDP2   | Transcription factor Dp-2 (E2F dimerization partner 2)              | 1 | 0.8007 | 0.8305 | 0.6302 |
| TP53    | Tumor protein p53                                                   | 1 | 0.6244 | 2.0388 | 1.5771 |
| WEE1    | WEE1 homolog (S. pombe)                                             | 1 | 0.3332 | 1.1666 | 1.2536 |

**Table S2. siRNA sequences.**

Non-targeting

Duplex #1: 5'-UGGUUUACAUGUCGACUAA-3'

Duplex #2: 5'-UGGUUUACAUGUUGUGUGA-3'

Duplex #3: 5'-UGGUUUACAUGUUUUCUGA-3'

Duplex #4: 5'-UGGUUUACAUGUUUCCUA-3'

Target: *MYH9*

Duplex #5: 5'-GUAUCAAUGUGACCGAUUU-3'

Duplex #6: 5'-CAAAGGAGCCCUGGCGUUA-3'

Duplex #7: 5'-GGAGGAACGCCGAGCAGUA-3'

Duplex #8: 5'-CGAAGCGGGUGAAAGCAA-3'

Target: *MYPT1*

Duplex #7: 5'-CAACUAAACAGGCCAAAUA-3'

Duplex #8: 5'-GCUAAAUAGUGGUCAUUA-3'

Duplex #9: 5'-ACAAAGAGACGUUGAUUAU-3'

Duplex #10: 5'-CGGAUCCAUUUCUAGAUA-3'

Target: *ROCK1*

Duplex #6: 5'-CUACAAGUGUUGCUAGUUU-3'

Duplex #7: 5'-UAGCAAUCGUAGAUACUUA-3'

Duplex #8: 5'-CCAGGAAGGUAUAUGCUAU-3'

Duplex #9: 5'-GCCAAUGACUUACUUAGGA-3'

Target: *ROCK2*

Duplex #6: 5'-GCAACUGGCUCGUUCAAUU-3'

Duplex #7: 5'-UAGAAUAUGUGGCCUAGAA-3'

Duplex #8: 5'-GAAACUAAUAGGACACUAA-3'

Duplex #9: 5'-CAAACUUGGUAAGAAUUG-3'
